# Supplementary material for: Electrospun Antibacterial Nanomaterials for Wound Dressings Applications
Source: MDPI journal article supplement (doi:10.3390/membranes11120908), 2021-11-23
Supplement: s1 [file s1]

## Review

# Electrospun Antibacterial Nanomaterials for Wound Dressings Applications

Aysegul Gul <sup>1</sup>, Izabela Gallus <sup>2</sup>, Akshat Tegginamath <sup>3</sup>, Jiri Maryska <sup>2</sup>, Fatma Yalcinkaya <sup>2,\*</sup>

<sup>1</sup> Institute for Nanomaterials, Advanced Technology and Innovation, Technical University of Liberec, Studentska 1402/2, 46117, Czech Republic ; aysegul.gul@tul.cz

<sup>2</sup> Faculty of Mechatronics, Informatics and Interdisciplinary Studies, Technical University of Liberec, Studentska 1402/2, 46117, Czech Republic; izabela.gallus@tul.cz (I.G.); jiri.maryska@tul.cz (J.M.)

<sup>3</sup> Faculty of Mechanical Engineering, Technical University of Liberec, Studentska 1402/2, 46117, Czech Republic; akshattm93@gmail.com

\* Correspondence: fatma.yalcinkaya@tul.cz; Tel.: +420-485353389

**Abstract:** Chronic wounds are caused by bacterial infection and create major healthcare discomfort. Hence, an antibacterial material is needed to use in wound dressing. Traditional wound dressing materials are unable to meet the needs for antibacterial properties. For this reason, designing an antibacterial wound dressing is demanded to accelerate the healing period. Electrospun nanofibers offer a promising solution to the management of wound healing. Nanofibers provide wide options for loading antibacterial compounds into the web. This review gives us an overview of some recent advances of electrospun antibacterial nanomaterials in wound dressing. First, we provide a brief overview of the electrospinning process, nanofibers in wound healing and then discuss electrospun fibers by incorporating various antimicrobial agents used in wound dressings. In addition, we highlight the latest research and patents related to electrospun nanofibers in wound dressing. This review aims to concentrate on the importance of nanofibers for wound dressing applications and discuss functionalized antibacterial nanofibers in wound dressing.

**Keywords:** nanofiber; nanomaterial; wound dressing; antibacterial; tissue engineering; biomedical; electrospinning.

**Citation:** Gul, A.; Gallus, I.; Tegginamath, A.; Maryska, J.; Yalcinkaya, F. Electrospun Antibacterial Nanomaterials for Wound Dressings Applications. *Membranes* **2021**, *11*, 908. <https://doi.org/10.3390/membranes11120908>

Academic Editor: Andrea Ehrmann

Received: 26 October 2021

Accepted: 19 November 2021

Published: 23 November 2021

**Publisher's Note:** MDPI stays neutral with regard to jurisdictional claims in published maps and institutional affiliations.

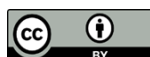

**Copyright:** © 2021 by the authors. Licensee MDPI, Basel, Switzerland. This article is an open access article distributed under the terms and conditions of the Creative Commons Attribution (CC BY) license (<https://creativecommons.org/licenses/by/4.0/>).

## SUPPLEMENTARY INFORMATION

**Table S1.** Patents from 2020 to 2021 for antibacterial electrospun wound dressings materials.

| Title                                                                                                                                                        | Publication number | Publication date | References |
|--------------------------------------------------------------------------------------------------------------------------------------------------------------|--------------------|------------------|------------|
| Electrospun Double-Layer Long-Acting Antibacterial Medical Dressing and Preparation Method Thereof                                                           | CN111012941A       | 2020-04-17       | [1]        |
| Antibacterial Disinfection Nanofiber Medical Dressing                                                                                                        | CN111557790A       | 2020-08-21       | [2]        |
| Polyvinyl Alcohol-Nano-Silver Dressing, Preparation Method and Application Thereof                                                                           | CN111321514A       | 2020-06-23       | [3]        |
| Preparation Method of Antibacterial Electrostatic Spinning Fiber Based on Polyion Liquid, Antibacterial Electrostatic Spinning Fiber and Application Thereof | CN111636110A       | 2020-09-08       | [4]        |
| Composite Dressing with Antibacterial Function and Preparation Method Thereof                                                                                | CN112169006A       | 2021-01-05       | [5]        |
| Plant Extract-Containing Wound Dressing and Application Thereof                                                                                              | CN112316196A       | 2021-02-05       | [6]        |
| Preparation Method of Antibacterial PBC/PLA/TP Composite Dressing                                                                                            | CN112831917A       | 2021-05-25       | [7]        |
| Polyethylene-Vinyl Alcohol/Gelatin Composite Electrostatic Spinning Wound Dressing and Preparation Method Thereof                                            | CN112741926A       | 2021-05-04       | [8]        |
| Preparation Method of Antibacterial PLA/PBC/CS Composite Dressing                                                                                            | CN112831918A       | 2021-05-25       | [9]        |

|                                                                                                                                                                                    |                              |                          |      |
|------------------------------------------------------------------------------------------------------------------------------------------------------------------------------------|------------------------------|--------------------------|------|
| Antibacterial Elastic Composite Medical Dressing and Preparation Method Thereof                                                                                                    | CN112755236A                 | 2021-05-07               | [10] |
| Alginate Composite Dressing and Preparation Method of Composite Dressing                                                                                                           | CN112206342A                 | 2021-01-12               | [11] |
| Functional Graphene-Based Fiber Hygienic Material                                                                                                                                  | CN111420112A                 | 2020-07-17               | [12] |
| Medical Composite Nanofiber Dressing as Well as Preparation Method and Application Thereof                                                                                         | CN111939307A                 | 2020-11-17               | [35] |
| Electrostatic Spinning Membrane Capable of Releasing Nitric Oxide Based on Near-Infrared Response as Well as Preparation Method and Application of Electrostatic Spinning Membrane | CN111945301A                 | 2020-11-17               | [13] |
| Multi-Component Double-Layer Composite Nano-Film Dressing and Production Method Thereof                                                                                            | CN112569397A                 | 2021-03-30               | [14] |
| Medical Composite Dressing for Wound Repair and Preparation Method Thereof                                                                                                         | CN111529748A<br>CN111529748B | 2020-08-14<br>2021-06-04 | [37] |
| Composite Hydrogel Wound Dressing and Preparation Method Thereof                                                                                                                   | CN111518288A                 | 2020-08-11               | [15] |
| Polyvinyl Alcohol/Carboxymethyl Chitosan Nanofiber Medical Dressing as Well as Preparation Method and Application Thereof                                                          | CN111118734A<br>CN111118734B | 2020-05-08<br>2021-06-01 | [16] |
| Antibacterial Healing-Promoting Nanofibre Scaffold and Nanofibre Scaffold Patch Made by Scaffold                                                                                   | CN111701070A                 | 2020-09-25               | [17] |

|                                                                                                                                          |              |            |      |
|------------------------------------------------------------------------------------------------------------------------------------------|--------------|------------|------|
| Preparation Method of Cellulose Diacetate-Based Three-Dimensional Scaffold with Both Antibacterial Property and Biocompatibility         | CN112064193A | 2020-12-11 | [18] |
| High-Air-Permeability Degradable Drug-Loaded Skin Wound Dressing and Preparation Method Thereof                                          | CN112807475A | 2021-05-18 | [19] |
| Chitosan Cross-Linked Antibacterial Nanofiber Membrane and Preparation Method Thereof                                                    | CN111334934A | 2020-06-26 | [20] |
| Self-Assembled Nanofiber Dressing for Promoting Vascularization Repair of Diabetes Ulcer, And Preparation Method and Application Thereof | CN111588901A | 2020-08-28 | [43] |
| Method for Preparing Antibacterial Gelatin Film Through Electrostatic Spinning                                                           | CN112481711A | 2021-03-12 | [21] |
| Preparation and Application of Hadscs-Loaded Double-Layer Skin Bionic Hydrogel Composite Scaffold                                        | CN112675360A | 2021-04-20 | [22] |
| Wound Protection Film for Preventing Pneumonia Virus Infection for Pediatrics and Preparation Method Thereof                             | CN111265709A | 2020-06-12 | [23] |
| Photo-Crosslinking/Electrostatic Spinning Preparation and Application of Hydrogel Composite Scaffold with Double-Layer Skin Structure    | CN112569399A | 2021-03-30 | [24] |
| Skin Wound Repair Plaster Loaded with Cell Regulatory Factor and Preparation Method of Skin Wound Repair Plaster                         | CN112336908A | 2021-02-09 | [25] |
| Drug Sustained and Controlled Release Platform System with Dual Nano Composite Structure                                                 | CN112353780A | 2021-02-12 | [48] |
| Multifunctional Intelligent Composite Gel Material as Well as Preparation Method and Application Thereof                                 | CN111073196A | 2020-04-28 | [26] |

|                                                                                 |              |            |      |
|---------------------------------------------------------------------------------|--------------|------------|------|
| Multifunctional Medical Material and Preparation Method and Application Thereof | CN112546295A | 2021-03-26 | [27] |
|---------------------------------------------------------------------------------|--------------|------------|------|

**Table S.2.** Studies for antibacterial electrospun wound dressing materials in 2020-2021.

| Polymer                                 | Antibacterial/other agents                         | Type of bacteria                                                             | Type of Electrospinning                  | Electrospinning parameters                                                                                                                                                | Highlights                                                                                                                                                                                                                                                          | References |
|-----------------------------------------|----------------------------------------------------|------------------------------------------------------------------------------|------------------------------------------|---------------------------------------------------------------------------------------------------------------------------------------------------------------------------|---------------------------------------------------------------------------------------------------------------------------------------------------------------------------------------------------------------------------------------------------------------------|------------|
| Poly (vinyl alcohol) (PVA)              | Honey and curcumin longa (turmeric) extract        | Staphylococcus aureus                                                        | Needle electrospinning                   | 12.3 kV, 23 kV, 0.45 kW a flow rate of 1.5 mL/h, 65% relative humidity and at 27°C, distance of collector 15 cm                                                           | Because of the presence of antibacterial constituents in honey and turmeric extract, the developed samples formed inhibition zones of 29 mm and 38 mm, respectively, whereas no inhibition zone was formed for the same bacteria when PVA nanofiber was used alone. | [28]       |
| PVA                                     | Palmarosa oil and phytoncide oil                   | Staphylococcus aureus and Candida albicans                                   | Emulsion (single-nozzle electrospinning) | Feed rate; from 0.2 to 1.8 mL/h. Voltage: 21–25 kV. The needle gauges: 23 (0.33 mm inner diameter.) and 27 (0.20 mm inner diameter). The tip-to-collector distance :18 cm | The palmarosa oil-containing electrospun core/sheath structured PVA nanofibrous membranes have a high potential as bioactive wound-dressing materials.                                                                                                              | [29]       |
| Polycaprolactone (PCL)/PVA_Pectin (PEC) | Chelidonium majusL. (C. majus)                     | Staphylococcus aureus (S. aureus) and Pseudomonas aeruginosa (P. aeruginosa) | Needleless emulsion electrospinning      | Voltage: 80 kV, distance from collector: 15 cm, Electrode rotation rate: 55 Hz                                                                                            | PCL/PVA-PEC nanofiber meshes have been found to have the potential to be used to prevent bacterial wound infection and consequently accelerate wound healing.                                                                                                       | [30]       |
| PCL                                     | Achyranthes aspera (AS) and Datura metel (DM) leaf | -                                                                            | Needle electrospinning                   | High-voltage DC power supply (14 kV), needle gauge: 18-mm, feed rate: 1.4 mL/h, distance from                                                                             | PCL-AS and PCL-DM nanofiber mats were found to have the ability to form mepidermis and granular tissue at an earlier stage of wound healing,                                                                                                                        | [31]       |

|                                                                                      |                                                    |                                                                                                                                                                    |                        |                                                                                           |                                                                                                                                                                                                                                                                                                                                                                                                      |      |
|--------------------------------------------------------------------------------------|----------------------------------------------------|--------------------------------------------------------------------------------------------------------------------------------------------------------------------|------------------------|-------------------------------------------------------------------------------------------|------------------------------------------------------------------------------------------------------------------------------------------------------------------------------------------------------------------------------------------------------------------------------------------------------------------------------------------------------------------------------------------------------|------|
|                                                                                      |                                                    |                                                                                                                                                                    |                        | collector; 12.5 cm.                                                                       | according to histopathological evaluation results.                                                                                                                                                                                                                                                                                                                                                   |      |
| PVA/beta-Cydo-dextrin (PVA/beta-CD)                                                  | Silver nanoparticles (Ag NPs), and riboflavin (RF) | Staphylococcus aureus and Escherichia coli                                                                                                                         | Needle electrospinning | Applied voltage: 20 kV, Feed rate: 0.6 mL/h, rotation speed: 1200 rpm, syringe; 21 gauge: | It was concluded that Ag nanoparticles and RF implanted scaffolds could be an effective wound dressing material.                                                                                                                                                                                                                                                                                     | [32] |
| Poly(L-lactide) (PLLA)                                                               | Ofloxacin (OFLX)                                   | Staphylococcus aureus and Escherichia coli                                                                                                                         | Needle electrospinning | Voltage: 20 kV<br>Feed rate: 0.4 mL/h<br>Distance from collector: 10 cm                   | In vitro cell viability tests revealed that PLLA Nanofiber mats loaded with OFLX up to 5% w/w were viable. It has been demonstrated that it is biocompatible and capable of cell proliferation.                                                                                                                                                                                                      | [33] |
| Thermoplastic polyurethane (TPU), antibacterial N-halamine incorporated polymer (AP) | N-Halamine                                         | Gram positive S. aureus (ATCC6538), Gram negative E. coli (ATCC8739) and fungi involved with Saccharomyces cerevisiae (ATCC9763) and Aspergillus niger (ATCC16404) | Needle electrospinning | Voltage: 1.5 kV/cm<br>Feed rate: 1.0 mL/h<br>Distance from collector: 10 cm               | It has been discovered that NMs can release Cl <sup>+</sup> in a sustained manner for approximately 6 days, following the Weibull pattern, indicating the desired stability. It was also determined that the NMs can be recharged using a simple chlorination process using diluted sodium hypochlorite solution, with a recharge efficiency of approximately 80% when compared to the original one. | [34] |
| PVA/chitosan                                                                         | Kaolin                                             | Staphylococcus aureus, Pseudomonas aeruginosa                                                                                                                      | Needle electrospinning | Voltage: 15–18 kV<br>Feed rate: 0.5 mL/h<br>Distance from collector: 15 cm                | After 14 days, rats treated with kaolin-containing mats were approximately 97.62 percent $\pm$ percent, compared to PVA/chitosan and sterile gauze, which were 86.15 percent $\pm$ 8.11 percent and 78.50 percent $\pm$ percent, respectively. It demonstrated a significant wound closure of up to 4.81 and 4.22 percent,                                                                           | [35] |

|                                                                                 |                                      |                                                                     |                        |                                                                                                                        |                                                                                                                                                                                                                                                                                                                                             |      |
|---------------------------------------------------------------------------------|--------------------------------------|---------------------------------------------------------------------|------------------------|------------------------------------------------------------------------------------------------------------------------|---------------------------------------------------------------------------------------------------------------------------------------------------------------------------------------------------------------------------------------------------------------------------------------------------------------------------------------------|------|
|                                                                                 |                                      |                                                                     |                        |                                                                                                                        | respectively. Histo-pathological studies revealed that the PVA/chitosan/kaolin group formed dense and regular collagen fibers, whereas wounds treated with sterile gauze or PVA/chitosan scaffolds formed random and loose collagen fibers.                                                                                                 |      |
| PCL/gelatin                                                                     | B12 vitamin                          | -                                                                   | Needle electrospinning | Voltage: 20 kV<br>Feed rate: 1.0 ml/h<br>Distance from collector: 15 cm<br>Mandrel speed: 550 and 600 rpm              | The study results showed that after 14 days, vitamin B12-containing dressing could significantly improve wound closure compared to vitamin B12-free scaffolds (92.27 ± 6.84 percent vs. 64.62 ± 2.96 percent).                                                                                                                              | [36] |
| Poly(epsilon-caprolactone) (PCL), quaternized chitosan-graft-polyaniline (QCSP) | QCSP                                 | Staphylococcus aureus (ATCC 29213) and Escherichia coli (ATCC 8379) | Needle electrospinning | Voltage: 17 kV and -4 kV<br>Feed rate: 0.04 ml/h<br>Distance from collector: 15 cm<br>Gauge: 19                        | PCL/QCSP15 (15 wt% QCSP in the sample) demonstrated a good balance of antibacterial activity and cell proliferation, indicating that it significantly accelerated wound healing in a mouse full-thickness wound defect model compared to commercial dressing (Tegaderm™ Film). and a nanofibrous membrane made entirely of PCL (PCL/QCSP0). | [37] |
| Poly(lactic acid glycolic acid) (PLGA)/silk fibroin (SF)                        | Silk fibroin (SF), artemisinin (ART) | -                                                                   | Needle electrospinning | Voltage: -1 kV, -20 kV<br>Feed rate: 0.8 mL/h<br>Distance from collector: 15 cm<br>Gauge: 23<br>Mandrel speed: 600 rpm | In this study, it has been proven that the produced PLGA/SF/ART2 fibrous membranes have a good anti-inflammatory effect.                                                                                                                                                                                                                    | [38] |
| PLA                                                                             | Zinc oxide (ZnO) nanoparticles,      | Staphylococcus aureus (Gram-                                        | Needle electrospinning | Voltage: 20 kV, flow rate: 0.6 mL/h                                                                                    | Antibacterial studies against Gram-positive Staphylococcus aureus and Gram-negative                                                                                                                                                                                                                                                         | [39] |

|              |                                                  |                                                                       |                        |                                                                          |                                                                                                                                                                                                                                                                                  |      |
|--------------|--------------------------------------------------|-----------------------------------------------------------------------|------------------------|--------------------------------------------------------------------------|----------------------------------------------------------------------------------------------------------------------------------------------------------------------------------------------------------------------------------------------------------------------------------|------|
|              | tranexamic acid (TXA)                            | positive, ATCC 25023) and Escherichia coli (Gram-negative, PTCC 1399) |                        | 1, tip-to-collector distance: 10 cm, and collector speed: 100 RPM        | Escherichia coli showed a 98% reduction in colony forming units and a 75% reduction in colony forming units, respectively. In vivo studies in the rat model revealed that nanocomposite dressing containing PLA/ZnO/TXA nanofibers aided wound healing.                          |      |
| PU, PAN, SPA | Polyhexamethylene guanidine hydrochloride (PHGC) | Staphylococcus aureus and Escherichia coli                            | Needle electrospinning | Voltage: 20 kV, flow rate: 0.1 mL/min., tip-to-collector distance: 18 cm | The designed tri-layered dressing exhibited approximately 100 percent antibacterial ability against Staphylococcus aureus and Escherichia coli when the concentration of antibacterial agents polyhexamethylene guanidine hydrochloride (PHGC) was 0.06 wt percent in the study. | [40] |

**Table S.3.** Therapeutic agents used in nanofibers.

| Purpose                           | Nanofiber                                                                    | Therapeutic agent used      | Reference |
|-----------------------------------|------------------------------------------------------------------------------|-----------------------------|-----------|
| Antibacterial                     | Chitosan/PVA                                                                 | Lysozyme                    | [41]      |
| Antibacterial                     | Gelatin/polyurethane; gelatin; polyurethane; poly(ethylene-co-vinyl alcohol) | Silver                      | [42–45]   |
| Antibacterial                     | PCL; alginate/PVA                                                            | ZnO                         | [46]      |
| Antibacterial                     | PLGA                                                                         | Cefoxitin sodium            | [47]      |
| Antibacterial                     | Chitosan                                                                     | Gentamicin                  | [48]      |
| Antibacterial                     | Polyurethane/dextran; PVA/ poly(vinyl acetate)                               | Ciprofloxacin HCl           | [49]      |
| Antibacterial                     | Cellulose acetate/polyester urethane                                         | Polyhexamethylene biguanide | [50]      |
| Pain management and antibacterial | PLLA                                                                         | Lidocaine, mupirocin        | [51]      |
| Hemostasis                        | PLLA                                                                         | Fibrinogen                  | [42]      |
| Antioxidant                       | PCL                                                                          | Curcumin                    | [52]      |
| Angiogenesis                      | Chitosan/PEO; HA/collagen                                                    | VEGF                        | [53]      |
| Angiogenesis, granulation tissue  | Polyurethane; HA/collagen                                                    | PDGF-BB                     | [54]      |



| formation                                                                                                        |                                                                                 |           |      |
|------------------------------------------------------------------------------------------------------------------|---------------------------------------------------------------------------------|-----------|------|
| Keratinocytes migration and maturation, angiogenesis                                                             | PCL-PEG/PCL; poly(l-lactic acid)-co-poly-(ε-caprolactone); HA/collagen; PCL/PEG | EGF       | [55] |
| Cell adhesion, proliferation, ECM secretion, re-epithelialization and skin appendages regeneration, angiogenesis | PELA; HA/collagen                                                               | Basic-FGF | [56] |

## References

- He, J.; Qi, L.; Ou, K.; Zhou, Y.; Yu, W.; Liu, C.; Yuan, P.; Liao, X.; Zhang, Y.; Chen, Y.; et al. Electrospun Double-Layer Long-Acting Antibacterial Medical Dressing and Preparation Method Thereof 2020.
- Chen, L. Antibacterial Disinfection Nanofiber Medical Dressing 2020.
- Gao, J.; He, Y.; Hao, Y.; Shen, M.; Li, J.; Zhao, Y.; Ran, Y.; Wang, S.; Zhao, X.; Ran, X.; et al. Polyvinyl Alcohol-Nano-Silver Dressing, Preparation Method and Application Thereof 2020.
- Guo, J.; Yan, F.; Wang, M.; Sun, Z. Preparation Method of Antibacterial Electrostatic Spinning Fiber Based on Polyion Liquid, Antibacterial Electrostatic Spinning Fiber and Application Thereof 2020.
- He, L.; Wan, J. Composite Dressing with Antibacterial Function and Preparation Method Thereof 2021.
- Feng, B.; Su, D.; Li, H.; Shi, J. Plant Extract-Containing Wound Dressing and Application Thereof 2021.
- Gu, X.; Zhang, D.; Liu, S.; Chen, H. Preparation Method of Antibacterial PBC/PLA/TP Composite Dressing 2021.
- Guo, D.; Li, T.; Sun, J. Polyethylene-Vinyl Alcohol/Gelatin Composite Electrostatic Spinning Wound Dressing and Preparation Method Thereof 2021.
- Gu, X.; Zhang, D.; Liu, S.; Chen, H. Preparation Method of Antibacterial PLA/PBC/CS Composite Dressing 2021.
- Wu, D.; Feng, Q.; Li, M.; Wei, A.; Liu, C.; Xu, H.; Tao, Y.; Zhou, T.; Zhao, L. Antibacterial Elastic Composite Medical Dressing and Preparation Method Thereof 2021.
- He, L.; Wan, J. Alginate Composite Dressing and Preparation Method of Composite Dressing 2021.
- Sun, J. Functional Graphene-Based Fiber Hygienic Material 2020.
- Ding, D.; Yan, F.; Zhang, W.; Cheng, N.; Wang, W. Electrostatic Spinning Membrane Capable of Releasing Nitric Oxide Based on Near-Infrared Response as Well as Preparation Method and Application of Electrostatic Spinning Membrane 2020.
- Fei, Y. Multi-Component Double-Layer Composite Nano-Film Dressing and Production Method Thereof 2021.
- Zheng, Y.; Feng, X.; Shi, X.; Yang, J. Composite Hydrogel Wound Dressing and Preparation Method Thereof 2020.
- Cheng, J.; Huang, Z.; Zhang, J. Polyvinyl Alcohol/Carboxymethyl Chitosan Nanofiber Medical Dressing as Well as Preparation Method and Application Thereof 2020.
- Yan, T.; Qin, C.; Liu, Y.; Xin, Q. Antibacterial Healing-Promoting Nanofibre Scaffold and Nanofibre Scaffold Patch Made by Scaffold 2020.
- Lang, M.; Liang, W. Preparation Method of Cellulose Diacetate-Based Three-Dimensional Scaffold with Both Antibacterial Property and Biocompatibility 2020.
- Chen, N. High-Air-Permeability Degradable Drug-Loaded Skin Wound Dressing and Preparation Method Thereof 2021.
- Ge, Y.; Tang, J.; Fu, Y.; Xie, Y.; Chen, P.; Xie, H. Chitosan Cross-Linked Antibacterial Nanofiber Membrane and Preparation Method Thereof 2020.
- Yu, N.; Li, J.; Ma, F.; Yang, P.; Zhu, Z.; Li, G.; Hou, W. Method for Preparing Antibacterial Gelatin Film through Electrostatic Spinning 2021.
- Li, Y.; Zang, H.; Song, T. Preparation and Application of HADSCs-Loaded Double-Layer Skin Bionic Hydrogel Composite Scaffold 2021.
- Chen, C. Wound Protection Film for Preventing Pneumonia Virus Infection for Pediatrics and Preparation Method Thereof 2020.
- Li, Y.; Zang, H.; Song, T. Photo-Crosslinking/Electrostatic Spinning Preparation and Application of Hydrogel Composite Scaffold with Double-Layer Skin Structure 2021.
- Yuan, B.; He, X.; Qiu, Y. Skin Wound Repair Plaster Loaded with Cell Regulatory Factor and Preparation Method of Skin Wound Repair Plaster 2021.

26. Yang, L.; Lin, X.; Mao, Y.; Bai, Y.; Chen, T.; Li, P. Multifunctional Intelligent Composite Gel Material as Well as Preparation Method and Application Thereof 2020.
27. Zou, J.; Li, L.; Li, J. Multifunctional Medical Material and Preparation Method and Application Thereof 2021.
28. Shahid, M.A.; Ali, A.; Uddin, M.N.; Miah, S.; Islam, S.M.; Mohebbullah, M.; Jamal, M.S.I. Antibacterial Wound Dressing Electrospun Nanofibrous Material from Polyvinyl Alcohol, Honey and Curcumin Longa Extract. *J. Ind. Text.* 2021, 51, 455–469, doi:10.1177/1528083720904379.
29. Lee, K.; Lee, S. Electrospun Nanofibrous Membranes with Essential Oils for Wound Dressing Applications. *Fiber. Polym.* 2020, 21, 999–1012, doi:10.1007/s12221-020-9300-6.
30. Mouro, C.; Gomes, A.P.; Ahonen, M.; Figueiro, R.; Gouveia, I.C. Chelidoniummajus L. Incorporated Emulsion Electrospun PCL/PVA\_PEC Nanofibrous Meshes for Antibacterial Wound Dressing Applications. *Nanomaterials* 2021, 11, 1785, doi:10.3390/nano11071785.
31. Suryamathi, M.; Viswanathamurthi, P.; Seedeivi, P. Herbal Plant Leaf Extracts Immobilized PCL Nanofibrous Mats as Skin-Inspired Anti-Infection Wound Healing Material. *Regen. Eng. Transl. Med.*, doi:10.1007/s40883-020-00193-9.
32. Balakrishnan, S.B.; Thambusamy, S. Preparation of Silver Nanoparticles and Riboflavin Embedded Electrospun Polymer Nanofibrous Scaffolds for in Vivo Wound Dressing Application. *Process Biochem.* 2020, 88, 148–158, doi:10.1016/j.procbio.2019.09.033.
33. Rade, P.P.; Garnaik, B. Ofloxacin-Loaded PLLA Nanofibrous Mats for Wound Dressing Applications. *ACS Appl. Bio Mater.* 2020, 3, 6648–6660, doi:10.1021/acsabm.0c00290.
34. Luo, H.; Yin, X.; Tan, P.; Shi, Y.; Gu, Y.; Zeng, R.; Tan, L. Engineering an Antibacterial Nanofibrous Membrane Containing N-Halamine for Recyclable Wound Dressing Application. *Mater. Today Commun.* 2020, 23, 100898, doi:10.1016/j.mtcomm.2020.100898.
35. Salehi, M.; Farzamfar, S.; Ehterami, A.; Paknejad, Z.; Bastami, F.; Shirian, S.; Vahedi, H.; Koehkonan, G.S.; Goodarzi, A. Kaolin-Loaded Chitosan/Polyvinyl Alcohol Electrospun Scaffold as a Wound Dressing Material: In Vitro and in Vivo Studies. *J. Wound Care* 2020, 29, 270–280, doi:10.12968/jowc.2020.29.5.270.
36. Farzanfar, S.; Kouzekonan, G.S.; Mirjani, R.; Shekarchi, B. Vitamin B12-Loaded Polycaprolacton/Gelatin Nanofibrous Scaffold as Potential Wound Care Material. *Biomed. Eng. Lett.* 2020, 10, 547–554, doi:10.1007/s13534-020-00165-6.
37. He, J.; Liang, Y.; Shi, M.; Guo, B. Anti-Oxidant Electroactive and Antibacterial Nanofibrous Wound Dressings Based on Poly(Epsilon-Caprolactone)/Quaternized Chitosan-Graft-Polyaniline for Full-Thickness Skin Wound Healing. *Chem. Eng. J.* 2020, 385, 123464, doi:10.1016/j.cej.2019.123464.
38. Peng, Y.; Ma, Y.; Bao, Y.; Liu, Z.; Chen, L.; Dai, F.; Li, Z. Electrospun PLGA/SF/Artemisinin Composite Nanofibrous Membranes for Wound Dressing. *International Journal of Biological Macromolecules* 2021, 183, 68–78, doi:10.1016/j.ijbiomac.2021.04.021.
39. Molapour Rashedi, S.; Khajavi, R.; Rashidi, A.; Rahimi, M.K.; Bahador, A. Novel PLA/ZnO Nanofibrous Nanocomposite Loaded with Tranexamic Acid as an Effective Wound Dressing: In Vitro and In Vivo Assessment. *Iranian Journal of Biotechnology* 2021, 19, 38–47, doi:10.30498/ijb.2021.220458.2737.
40. Qi, L.; Ou, K.; Hou, Y.; Yuan, P.; Yu, W.; Li, X.; Wang, B.; He, J.; Cui, S.; Chen, X. Unidirectional Water-Transport Antibacterial Trilayered Nanofiber-Based Wound Dressings Induced by Hydrophilic-Hydrophobic Gradient and Self-Pumping Effects. *Materials & Design* 2021, 201, 109461, doi:10.1016/j.matdes.2021.109461.
41. Charernsriwilaiwat, N.; Opanasopit, P.; Rojanarata, T.; Ngawhirunpat, T. Lysozyme-Loaded, Electrospun Chitosan-Based Nanofiber Mats for Wound Healing. *International Journal of Pharmaceutics* 2012, 427, 379–384, doi:10.1016/j.ijpharm.2012.02.010.
42. Heo, D.N.; Yang, D.H.; Lee, J.B.; Bae, M.S.; Kim, J.H.; Moon, S.H.; Chun, H.J.; Kim, C.H.; Lim, H.-N.; Kwon, I.K. Burn-Wound Healing Effect of Gelatin/Polyurethane Nanofiber Scaffold Containing Silver-Sulfadiazine. *Journal of Biomedical Nanotechnology* 2013, 9, 511–515, doi:10.1166/jbn.2013.1509.
43. Rujitanaroj, P.; Pimpha, N.; Supaphol, P. Wound-Dressing Materials with Antibacterial Activity from Electrospun Gelatin Fiber Mats Containing Silver Nanoparticles. *Polymer* 2008, 49, 4723–4732, doi:10.1016/j.polymer.2008.08.021.
44. Chen, J.-P.; Chiang, Y. Bioactive Electrospun Silver Nanoparticles-Containing Polyurethane Nanofibers as Wound Dressings. *J Nanosci Nanotechnol* 2010, 10, 7560–7564, doi:10.1166/jnn.2010.2829.
45. Xu, C.; Xu, F.; Wang, B.; Lu, T. Electrospinning of Poly(Ethylene-Co-Vinyl Alcohol) Nanofibres Encapsulated with Ag Nanoparticles for Skin Wound Healing. *Journal of Nanomaterials* 2011, 2011, 1–7, doi:10.1155/2011/201834.
46. Shalumon, K.T.; Anulekha, K.H.; Nair, S.V.; Nair, S.V.; Chennazhi, K.P.; Jayakumar, R. Sodium Alginate/Poly(Vinyl Alcohol)/Nano ZnO Composite Nanofibers for Antibacterial Wound Dressings. *International Journal of Biological Macromolecules* 2011, 49, 247–254, doi:10.1016/j.ijbiomac.2011.04.005.
47. Kim, K.; Luu, Y.K.; Chang, C.; Fang, D.; Hsiao, B.S.; Chu, B.; Hadjiargyrou, M. Incorporation and Controlled Release of a Hydrophilic Antibiotic Using Poly(Lactide-Co-Glycolide)-Based Electrospun Nanofibrous Scaffolds. *Journal of Controlled Release* 2004, 98, 47–56, doi:10.1016/j.jconrel.2004.04.009.
48. Monteiro, N.; Martins, M.; Martins, A.; Fonseca, N.A.; Moreira, J.N.; Reis, R.L.; Neves, N.M. Antibacterial Activity of Chitosan Nanofiber Meshes with Liposomes Immobilized Releasing Gentamicin. *Acta Biomaterialia* 2015, 18, 196–205, doi:10.1016/j.actbio.2015.02.018.
49. Jannesari, M.; Varshosaz, J.; Morshed, M.; Zamani, M. Composite Poly(Vinyl Alcohol)/Poly(Vinyl Acetate) Electrospun Nanofibrous Mats as a Novel Wound Dressing Matrix for Controlled Release of Drugs. *Int J Nanomedicine* 2011, 6, 993–1003, doi:10.2147/IJN.S17595.

- 
50. Liu, X.; Lin, T.; Gao, Y.; Xu, Z.; Huang, C.; Yao, G.; Jiang, L.; Tang, Y.; Wang, X. Antimicrobial Electrospun Nanofibers of Cellulose Acetate and Polyester Urethane Composite for Wound Dressing. *Journal of Biomedical Materials Research Part B: Applied Biomaterials* 2012, 100B, 1556–1565, doi:10.1002/jbm.b.32724.
51. Thakur, R.A.; Florek, C.A.; Kohn, J.; Michniak, B.B. Electrospun Nanofibrous Polymeric Scaffold with Targeted Drug Release Profiles for Potential Application as Wound Dressing. *International Journal of Pharmaceutics* 2008, 364, 87–93, doi:10.1016/j.ijpharm.2008.07.033.
52. Merrell, J.G.; McLaughlin, S.W.; Tie, L.; Laurencin, C.T.; Chen, A.F.; Nair, L.S. Curcumin Loaded Poly( $\epsilon$ -Caprolactone) Nanofibers: Diabetic Wound Dressing with Antioxidant and Anti-Inflammatory Properties. *Clin Exp Pharmacol Physiol* 2009, 36, 1149–1156, doi:10.1111/j.1440-1681.2009.05216.x.
53. Xie, Z.; Paras, C.B.; Weng, H.; Punnaikitikashem, P.; Su, L.-C.; Vu, K.; Tang, L.; Yang, J.; Nguyen, K.T. Dual Growth Factor Releasing Multi-Functional Nanofibers for Wound Healing. *Acta Biomaterialia* 2013, 9, 9351–9359, doi:10.1016/j.actbio.2013.07.030.
54. Lai, H.-J.; Kuan, C.-H.; Wu, H.-C.; Tsai, J.-C.; Chen, T.-M.; Hsieh, D.-J.; Wang, T.-W. Tailored Design of Electrospun Composite Nanofibers with Staged Release of Multiple Angiogenic Growth Factors for Chronic Wound Healing. *Acta Biomaterialia* 2014, 10, 4156–4166, doi:10.1016/j.actbio.2014.05.001.
55. Choi, J.S.; Leong, K.W.; Yoo, H.S. In Vivo Wound Healing of Diabetic Ulcers Using Electrospun Nanofibers Immobilized with Human Epidermal Growth Factor (EGF). *Biomaterials* 2008, 29, 587–596, doi:10.1016/j.biomaterials.2007.10.012.
56. Yang, Y.; Xia, T.; Zhi, W.; Wei, L.; Weng, J.; Zhang, C.; Li, X. Promotion of Skin Regeneration in Diabetic Rats by Electrospun Core-Sheath Fibers Loaded with Basic Fibroblast Growth Factor. *Biomaterials* 2011, 32, 4243–4254, doi:10.1016/j.biomaterials.2011.02.042.
